# Supplementary material for: Nanofibers for improving the wound repair process: the combination of a grafted chitosan and an antioxidant agent
Source: Royal Society of Chemistry journal article supplement (doi:10.1039/c7py00038c), 2017-01-01
Supplement: c7py00038c1.pdf [file c7py00038c1.pdf]

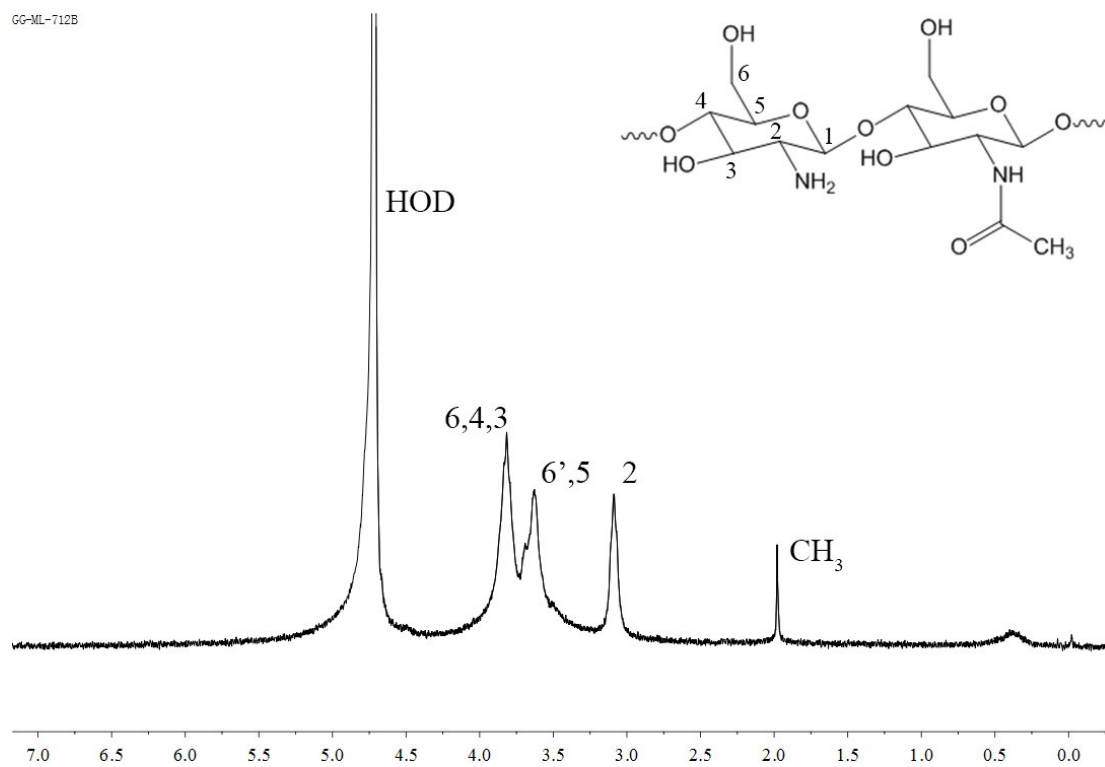

Fig. S1. <sup>1</sup>H-NMR spectra of chitosan. CD<sub>3</sub>COOH/D<sub>2</sub>O (v/v, 1:60) was used as solvent.

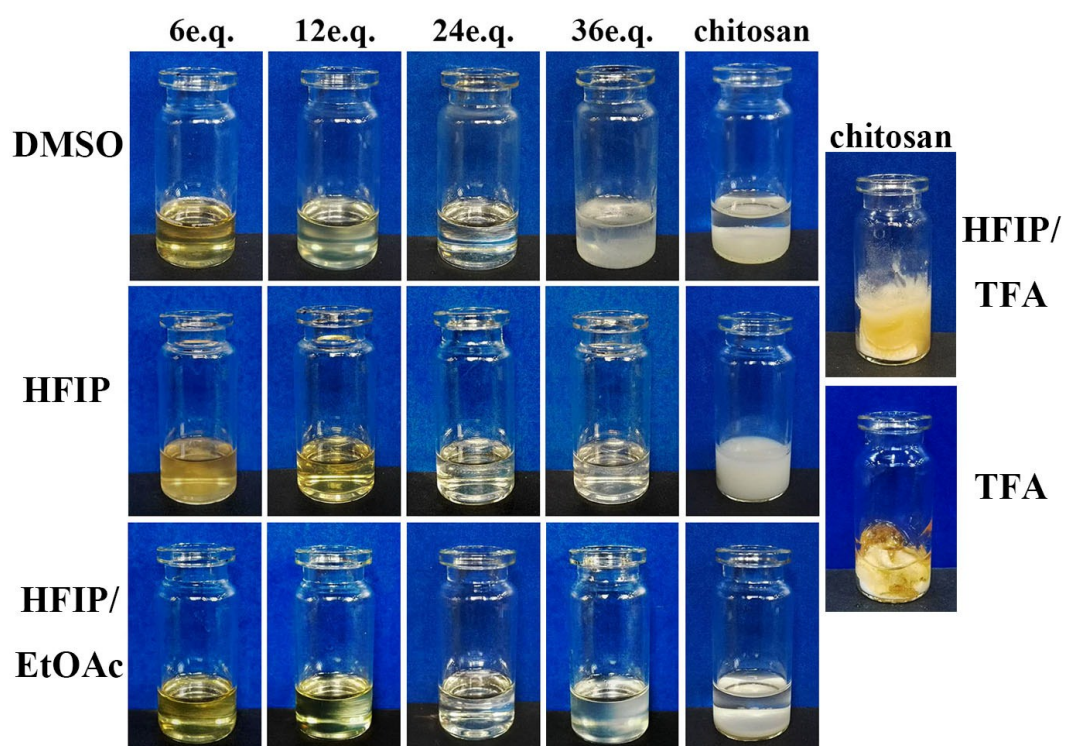

Fig. S2. Solubility of g-CS in common solvents. 500mg polymers were dissolved by 3ml of solvents and left to stand for 24 hours. Chitosan was dissolved in 3ml HFIP/TFA (v/v = 9:1) and TFA (the right panel) and was stirred for 24 hours. The polysaccharide can not be completely moistened forming viscous mixture.

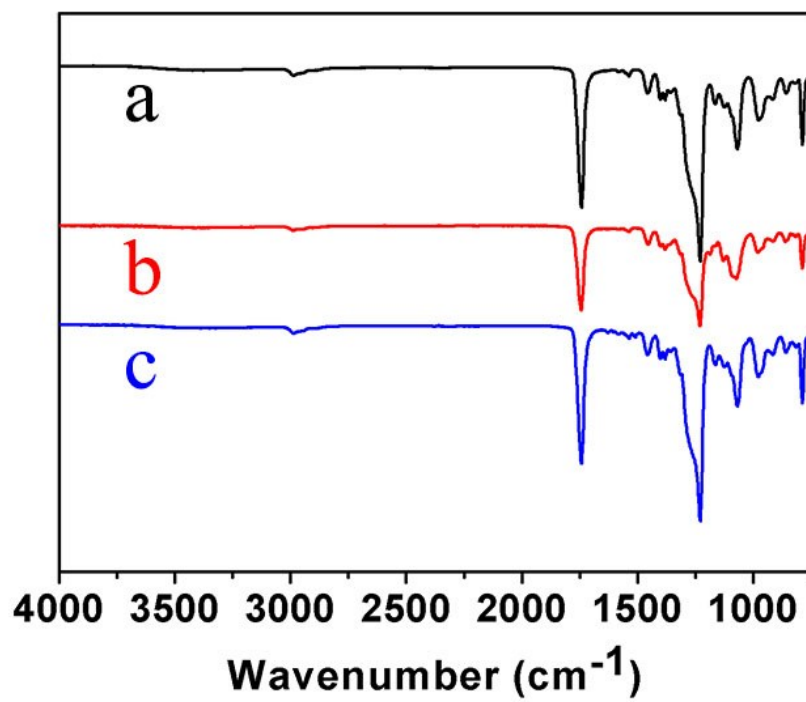

Fig. S3. FT-IR spectra of (a) PPC, (b) PPC/g-CS and (c) PPC CUR.

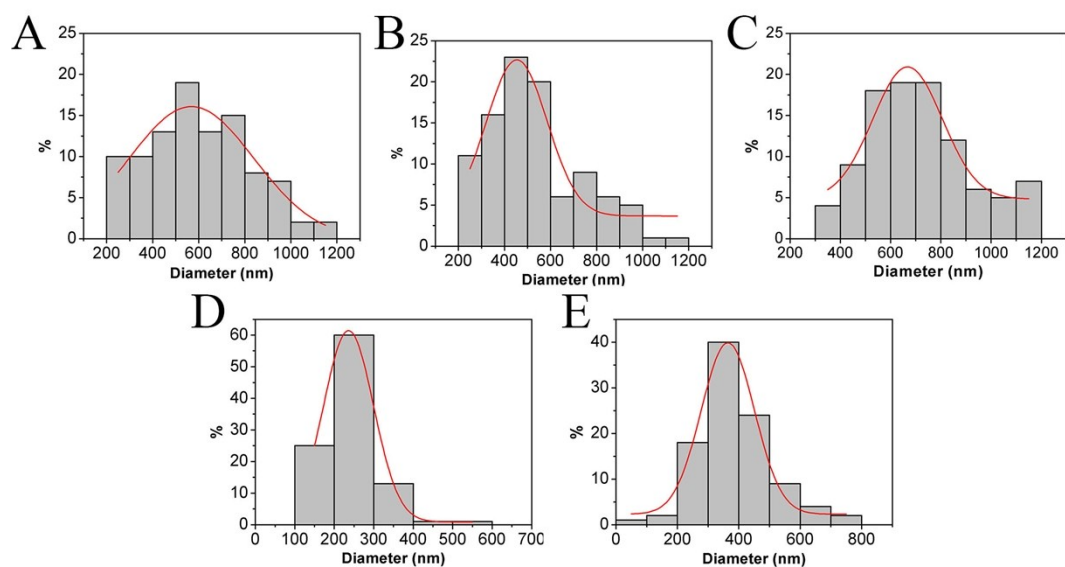

Fig. S4. Diameter distribution of electrospinning nanofibers: (A) PPC, (B) PPC/CS, (C) PPC CUR, (D) PPC/g-CS and (E) PPC/g-CS CUR.
